# Supplementary material for: Lactiplantibacillus biofilm and planktonic cells ameliorate ulcerative colitis in mice via immunoregulatory activity, gut metabolism and microbiota modulation
Source: Royal Society of Chemistry journal article supplement (doi:10.1039/d3fo02733c), 2023-01-01
Supplement: d3fo02733c2.pdf [file d3fo02733c2.pdf]

Fig. S1. The relative abundance of the top 10 gut microbiota at the phylum level (A, C) and genus level (B, D) in the colitis mice pre-treated and post-treated with *L. paraplantarum* LR-1 biofilm and planktonic cells (n=6).

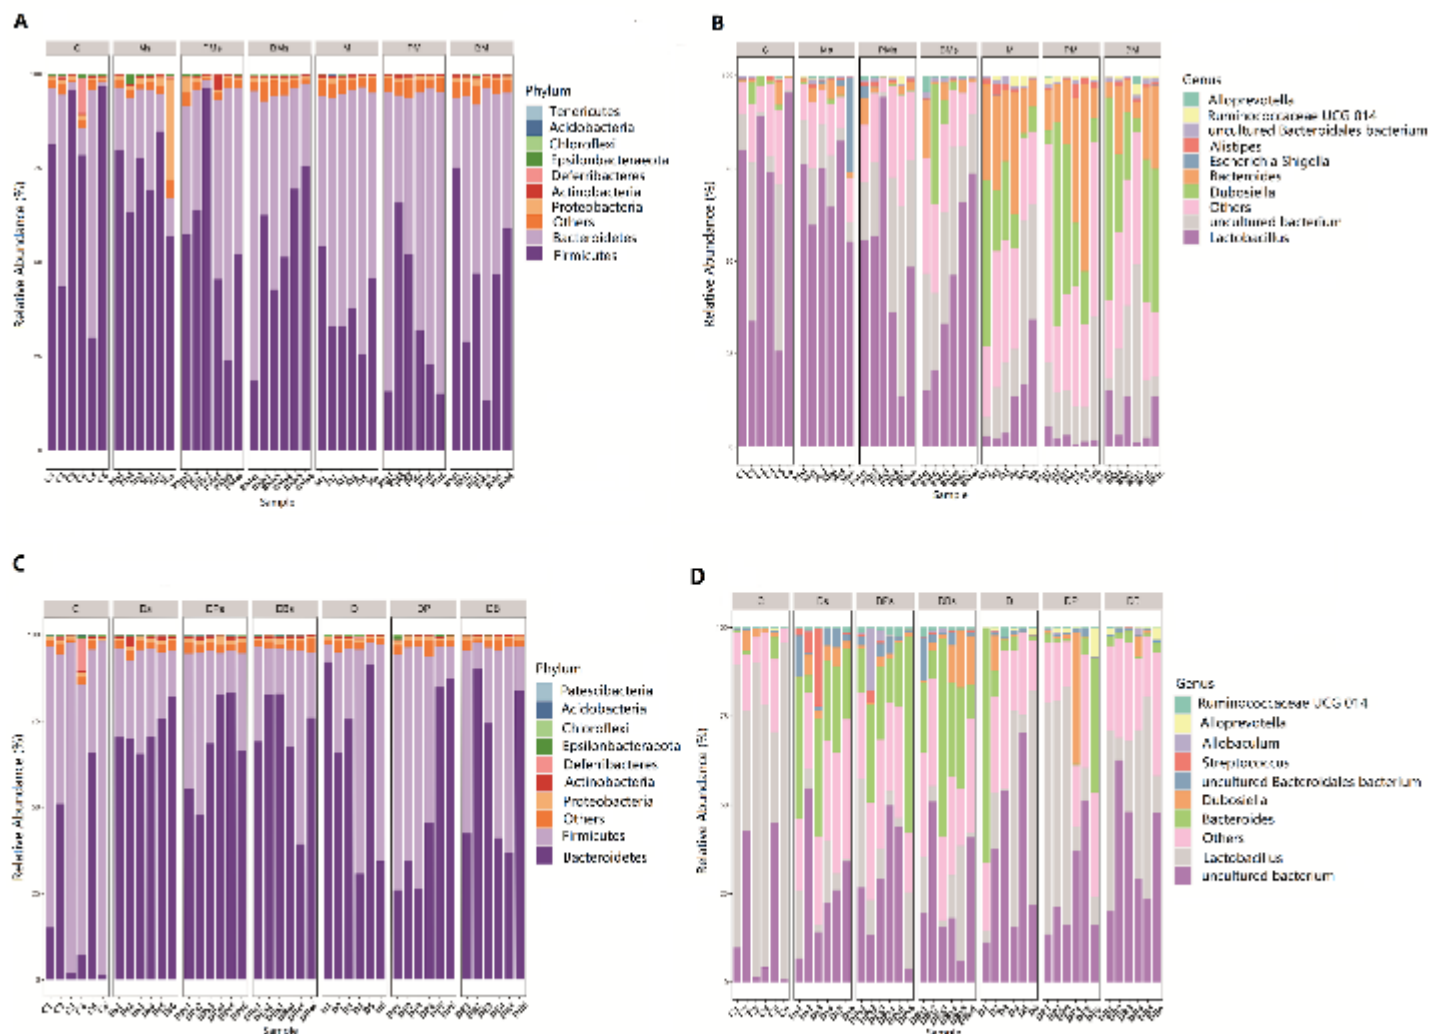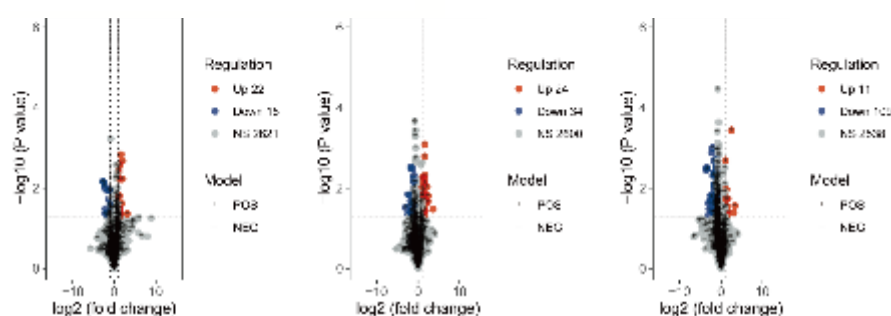

Fig. S2. The differential metabolites in the M vs. C (A), PM vs. C (B), BM vs. C (C), PM vs. M (D), BM vs. M (E), and BM vs. PM (F) group comparisons of the intestinal content of the colitis mice pre-treated with *L. paraplantarum* LR-1 biofilm and planktonic cells. The D vs. C (G), DP vs. C (H), DB vs. C (I), DP vs. C (J), DB vs. D (K), and DB vs. DP (L) group comparisons of the intestinal content of the colitis mice treated with *L. paraplantarum* LR-1 biofilm and planktonic cells. The different metabolites between the two groups were selected using Student's t-test ( $P < 0.05$ ). In the volcano, the red and blue dot represents an up-regulation (fold change  $> 2.0$  and  $P < 0.05$ ) and down-regulation (fold change  $< 0.5$  and  $P < 0.05$ ) metabolite, respectively, while the gray dot represents no significant metabolite ( $|\log_2(\text{fold change})| < 1.0$  or  $P > 0.05$ ). In addition, label "+" and "-" indicates positive and negative mode, respectively.

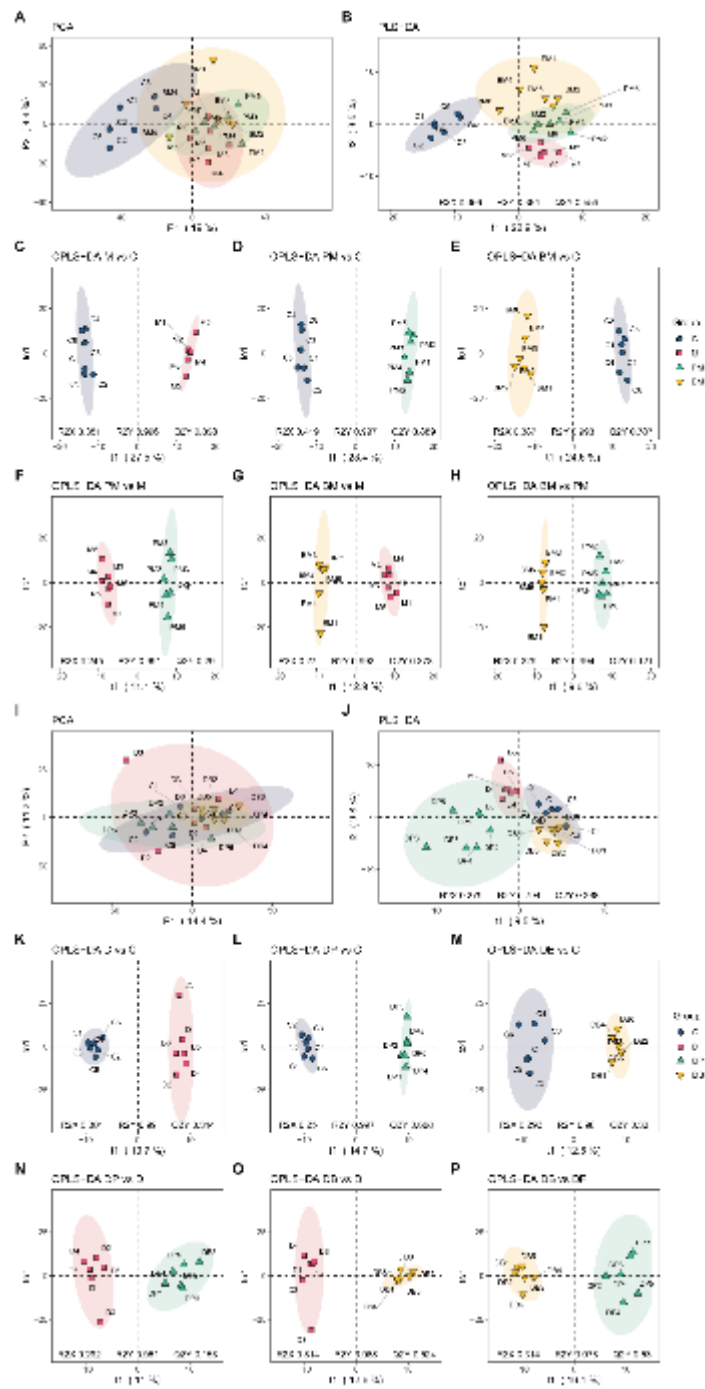

Fig. S3. The PCA (A), PLS-DA (B), and OPLS-DA of the metabolites in the M vs. C (C), PM vs. C (D), BM vs. C (E), PM vs. M (F), BM vs. M (G), and BM vs. PM (H) group comparisons during

the preventive evaluation experiment. The PCA (I), PLS-DA (J), and OPLAS-DA of the metabolites in the D vs. C (K), DP vs. C (L), DB vs. C (M), DP vs. D (N), DB vs. D (O), and DB vs. DP (P) group comparisons during the therapeutic evaluation experiment (n=6). The ellipses represent 95% confidence intervals around the centroid of each data cluster.

Table S1 Mice colon histological score system

| Inflammatory infiltration depth | Tissue damage degree | Mucosal damage degree                        | Score |
|---------------------------------|----------------------|----------------------------------------------|-------|
| No evidence                     | No evidence          | No evidence                                  | 0     |
| Mucous layer                    | Local damage         | Low level of goblet cell loss                | 1     |
| Submucosa layer                 | Erosion and ulcer    | Moderate level of goblet cell and crypt loss | 2     |
| Muscularis mucosae              | Large range damage   | High level of goblet cell and crypt loss     | 3     |

Table S2 Detailed information of the code names and metabolites in correlation analysis of the preventive experiment.

| Code name | Metabolites                                                               |
|-----------|---------------------------------------------------------------------------|
| M1        | S-Adenosylmethionine                                                      |
| M2        | S-methyl-5'-thioadenosine                                                 |
| M3        | Diacetylrhein                                                             |
| M4        | 2-Hydroxyphenylacetic acid                                                |
| M5        | 2,5-dimethoxy-4-ethylamphetamine                                          |
| M6        | Acetylnorfentanyl                                                         |
| M7        | Benzeneethanamine,3,5-dimethoxy-.alpha.-methyl-4-propoxy-                 |
| M8        | Benzoic acid, 4-[(1s)-1-[[5-chloro-2-(4-fluorophenoxy)benzoyl]amino]ethyl |
| M9        | Bisphenol a                                                               |
| M10       | Bisphenol b                                                               |
| M11       | Desmethylverapamil                                                        |
| M12       | Flufenacet                                                                |
| M13       | N-benzyl-n-methylpiperidin-3-amine                                        |
| M14       | Tyramine                                                                  |
| M15       | Zinniol                                                                   |
| M16       | Gambogic acid                                                             |
| M17       | Doxepin                                                                   |
| M18       | N-acetylputrescine                                                        |
| M19       | (S)-2-aminobutyric acid                                                   |
| M20       | .gamma.-l-glu-.epsilon.-l-lys                                             |
| M21       | 2-phenylpiperidine-2-acetamide                                            |
| M22       | 3-aminobutanoic acid                                                      |
| M23       | 3-aminohexanoic acid                                                      |
| M24       | 4-amino-4-methylpentanoic acid                                            |
| M25       | Ala-Ala-Arg                                                               |
| M26       | Ala-Lys                                                                   |
| M27       | Arg-Asn                                                                   |
| M28       | Arg-Asn-Arg                                                               |
| M29       | Arg-Asn-Lys                                                               |
| M30       | Arg-glu                                                                   |
| M31       | Arg-glyM                                                                  |
| M32       | Arg-Lys                                                                   |
| M33       | Arg-Lys-Lys                                                               |
| M34       | Arg-Pro                                                                   |
| M35       | Arg-Pro-Pro                                                               |
| M36       | Arg-Trp                                                                   |
| M37       | Arginine                                                                  |
| M38       | Asn-Gly-Lys                                                               |
| M39       | Asn-Leu                                                                   |
| M40       | Aspartic acid                                                             |
| M41       | Bradykinin hydroxyproline                                                 |
| M42       | D-Ornithine                                                               |
| M43       | Dihydrofolic acid                                                         |
| M44       | DL-arginine                                                               |
| M45       | DL-Lysine                                                                 |
| M46       | Glu-Arg                                                                   |
| M47       | Glu-Asn-Arg                                                               |
| M48       | Glu-Lys                                                                   |
| M49       | Gly-pro-arg-pro-amide                                                     |
| M50       | Ile-Asp                                                                   |
| M51       | Ile-Leu-Arg                                                               |
| M52       | Ile-Leu-Lys                                                               |
| M53       | L-citrulline                                                              |
| M54       | L-Glutamine                                                               |
| M55       | L-ng-monomethylarginine                                                   |
| M56       | L-thiocitrulline                                                          |
| M57       | Lys-Ala                                                                   |
| M58       | Lys-Gln                                                                   |
| M59       | Lys-Glu                                                                   |

---

|      |                                                                        |
|------|------------------------------------------------------------------------|
| M60  | Lys-Gly                                                                |
| M61  | Lys-Leu-Arg                                                            |
| M62  | Lys-lys                                                                |
| M63  | Lys-Pro                                                                |
| M64  | Lys-Thr                                                                |
| M65  | Lys-Val-Lys                                                            |
| M66  | Lysine                                                                 |
| M67  | Mi-fluoro-dl-phenylalanine                                             |
| M68  | N-.alpha.-(tert-butoxycarbonyl)-l-valine                               |
| M69  | N-acetylhistidine                                                      |
| M70  | N-arachidonoyl-.gamma.-aminobutyric acid                               |
| M71  | N-fructosyl pyroglutamate                                              |
| M72  | N6,N6,N6-Trimethyl-L-lysine                                            |
| M73  | Ng,ng-dimethyl-l-arginine                                              |
| M74  | Ornithine                                                              |
| M75  | Pyroglu-Glu-Lys                                                        |
| M76  | Ser-Arg                                                                |
| M77  | Ser-Cys-Lys                                                            |
| M78  | Ser-Leu-Ile-Gly-Lys-Val-Amide                                          |
| M79  | Ser-Lys                                                                |
| M80  | Thiazolidine-4-carboxylic acid                                         |
| M81  | Thr-Arg                                                                |
| M82  | Thr-Arg-Lys                                                            |
| M83  | Thr-Lys                                                                |
| M84  | Thr-Ser-Lys                                                            |
| M85  | Trp-Lys                                                                |
| M86  | val-Arg-Lys                                                            |
| M87  | Val-Asn                                                                |
| M88  | val-Asp-Arg                                                            |
| M89  | Val-Lys                                                                |
| M90  | val-Thr-Arg                                                            |
| M91  | Quinine                                                                |
| M92  | Entacapone                                                             |
| M93  | Orotate                                                                |
| M94  | Vitamin c                                                              |
| M95  | Cabergoline                                                            |
| M96  | Ergonovine                                                             |
| M97  | Lsd                                                                    |
| M98  | (2e,4e)-hexa-2,4-dienoic acid                                          |
| M99  | (z)-5,8,11-trihydroxyoctadec-9-enoic acid                              |
| M100 | 1,2-dihydroxyheptadec-16-en-4-yl acetate                               |
| M101 | 15-cyclohexylpentanorprostaglandin f2.alpha.                           |
| M102 | 15-deoxy-delta-12,14-pg2                                               |
| M103 | 15-ketoprostaglandin f2.alpha.                                         |
| M104 | Dodecanedioic acid                                                     |
| M105 | Esfenvalerate                                                          |
| M106 | Ethylmalonic acid                                                      |
| M107 | Heptadecanoic acid                                                     |
| M108 | Limaprost                                                              |
| M109 | Misoprostol (free acid)                                                |
| M110 | Oleic acid methyl ester                                                |
| M111 | Prostaglandin e1                                                       |
| M112 | Prostaglandin f2.alpha                                                 |
| M113 | 3,5,7-trihydroxy-4'-methoxyflavone                                     |
| M114 | 7-hydroxyflavanone                                                     |
| M115 | 1-palmitoylglycerol                                                    |
| M116 | 1-hexadecyl-2-azelaoyl-sn-glycero-3-phosphocholine                     |
| M117 | 1-myristoyl-2-hydroxy-sn-glycero-3-phosphoethanolamine                 |
| M118 | 1-palmitoyl-2-hydroxy-sn-glycero-3-phosphoethanolamine                 |
| M119 | 1-palmitoyl-2-linoleoyl-sn-glycero-3-phospho-(1'-rac-glycerol)         |
| M120 | 1-Stearoyl-sn-glycerol 3-phosphocholine(LPC(18:0))                     |
| M121 | 1,2-diarachidonoyl-sn-glycero-3-phosphocholine                         |
| M122 | 1,2-dioleoyl-sn-glycero-3-phospho-(1'-myo-inositol-3',4'-bisphosphate) |

---

---

|      |                                                                                                                                                                                                                                                                                                                                                                            |
|------|----------------------------------------------------------------------------------------------------------------------------------------------------------------------------------------------------------------------------------------------------------------------------------------------------------------------------------------------------------------------------|
| M123 | 1,2-dioleoyl-sn-glycero-3-phosphoethanolamine-n-methyl                                                                                                                                                                                                                                                                                                                     |
| M124 | 2-(5-oxovaleryl)phosphatidylcholine                                                                                                                                                                                                                                                                                                                                        |
| M125 | sn-Glycerol 3-phosphoethanolamine                                                                                                                                                                                                                                                                                                                                          |
| M126 | Harmaline                                                                                                                                                                                                                                                                                                                                                                  |
| M127 | 1-methylxanthine                                                                                                                                                                                                                                                                                                                                                           |
| M128 | Adenine                                                                                                                                                                                                                                                                                                                                                                    |
| M129 | N6-methyladenine                                                                                                                                                                                                                                                                                                                                                           |
| M130 | Phenol,4-[2-[[2-benzo[b]thien-3-yl-9-(1-methylethyl)-9h-purin-6-yl]amino]ethyl]-                                                                                                                                                                                                                                                                                           |
| M131 | 1h-indole-3-carboxylic acid, 1-(4-hydroxypentyl)-,8-quinolinyl ester                                                                                                                                                                                                                                                                                                       |
| M132 | 1h-indole-3-propanoic acid                                                                                                                                                                                                                                                                                                                                                 |
| M133 | Indole-3-carboxaldehyde                                                                                                                                                                                                                                                                                                                                                    |
| M134 | Indole-3-carboxylic acid                                                                                                                                                                                                                                                                                                                                                   |
| M135 | Melatonin                                                                                                                                                                                                                                                                                                                                                                  |
| M136 | Genistein 7-o-beta-d-glucoside-6"-o-malonate                                                                                                                                                                                                                                                                                                                               |
| M137 | Tetramethrin                                                                                                                                                                                                                                                                                                                                                               |
| M138 | Alpha-ketoisovaleric acid                                                                                                                                                                                                                                                                                                                                                  |
| M139 | 1,3-dicyclohexylurea                                                                                                                                                                                                                                                                                                                                                       |
| M140 | Thiosultap                                                                                                                                                                                                                                                                                                                                                                 |
| M141 | Guanidinopropionic acid                                                                                                                                                                                                                                                                                                                                                    |
| M142 | N-(4-chlorophenyl)-4-piperidinamine                                                                                                                                                                                                                                                                                                                                        |
| M143 | Sphingosine                                                                                                                                                                                                                                                                                                                                                                |
| M144 | (e)-n-[2-[3-acetamido-4,5-dihydroxy-6-(hydroxymethyl)oxan-2-yl]oxy-6-[2-[5-(2,4-dioxypyrimidin-1-yl)-3,4-dihydroxyoxolan-2-yl]-2-hydroxyethyl]-4,5-dihydroxyoxan-3-yl]-13-methyltetradec-2-enamide                                                                                                                                                                         |
| M145 | .alpha.-d-galactose 1-phosphate                                                                                                                                                                                                                                                                                                                                            |
| M146 | 2-methyl-3-buten-2-ol                                                                                                                                                                                                                                                                                                                                                      |
| M147 | 4-oxo-2-nonenal                                                                                                                                                                                                                                                                                                                                                            |
| M148 | alpha-D-Glucose 1-phosphate                                                                                                                                                                                                                                                                                                                                                |
| M149 | Arbutin                                                                                                                                                                                                                                                                                                                                                                    |
| M150 | Blood group a trisaccharide                                                                                                                                                                                                                                                                                                                                                |
| M151 | Blood group b trisaccharide                                                                                                                                                                                                                                                                                                                                                |
| M152 | Clofibric acid acyl-.beta.-d-glucuronide                                                                                                                                                                                                                                                                                                                                   |
| M153 | Cynarin                                                                                                                                                                                                                                                                                                                                                                    |
| M154 | D-ribose                                                                                                                                                                                                                                                                                                                                                                   |
| M155 | D-ribulose 5-phosphate                                                                                                                                                                                                                                                                                                                                                     |
| M156 | Disialyllacto-n-tetraose                                                                                                                                                                                                                                                                                                                                                   |
| M157 | G2f                                                                                                                                                                                                                                                                                                                                                                        |
| M158 | Glyceric acid                                                                                                                                                                                                                                                                                                                                                              |
| M159 | Enniatin b                                                                                                                                                                                                                                                                                                                                                                 |
| M160 | Cisapride                                                                                                                                                                                                                                                                                                                                                                  |
| M161 | Norepinephrine                                                                                                                                                                                                                                                                                                                                                             |
| M162 | p-Hydroxyphenylacetic acid                                                                                                                                                                                                                                                                                                                                                 |
| M163 | 3'-hydroxyrepaglinide                                                                                                                                                                                                                                                                                                                                                      |
| M164 | N1,n1,n2-trimethyl-n2-(4-piperidinyl)-1,2-ethanediamine                                                                                                                                                                                                                                                                                                                    |
| M165 | Trans-3-methylfentanyl                                                                                                                                                                                                                                                                                                                                                     |
| M166 | [(2s,3r,4s,5s,6r)-3,4,5-trihydroxy-6-[(2r,3r,4s,5s,6r)-3,4,5-trihydroxy-6-(hydroxymethyl)oxan-2-yl]oxy-6-methyl]oxan-2-yl]-(4as,6as,6br,9r,10s,12ar,14bs)-10-[(2s,3r,4s,5s)-4,5-dihydroxy-3-[(2s,3r,4r,5r,6s)-3,4,5-trihydroxy-6-methyl-oxan-2-yl]oxy-9-(hydroxymethyl)-2,2,6a,6b,9,12a-hexamethyl-1,3,4,5,6,6a,7,8,8a,10,11,12,13,14b-tetradecahydropicene-4a-carboxylate |
| M167 | [5-acetyloxy-3-(hydroxymethyl)-2-oxo-6-propan-2-ylcyclohex-3-en-1-yl] 3-methylpentanoate                                                                                                                                                                                                                                                                                   |
| M168 | Alisol a 24-acetate                                                                                                                                                                                                                                                                                                                                                        |
| M169 | Asiatic acid                                                                                                                                                                                                                                                                                                                                                               |
| M170 | Beta-carotene-3,4,3'4'-tetrol                                                                                                                                                                                                                                                                                                                                              |
| M171 | Cabazitaxel (jevtana)                                                                                                                                                                                                                                                                                                                                                      |
| M172 | Crocini                                                                                                                                                                                                                                                                                                                                                                    |
| M173 | Gibberellin a4                                                                                                                                                                                                                                                                                                                                                             |
| M174 | 1-methyladenosine                                                                                                                                                                                                                                                                                                                                                          |
| M175 | Adenosine                                                                                                                                                                                                                                                                                                                                                                  |
| M176 | Deoxyadenosine                                                                                                                                                                                                                                                                                                                                                             |
| M177 | 3-aminopyridine                                                                                                                                                                                                                                                                                                                                                            |
| M178 | 2',3'-dideoxycytidine                                                                                                                                                                                                                                                                                                                                                      |
| M179 | Uridine                                                                                                                                                                                                                                                                                                                                                                    |

---

---

|      |                                                                                                                                                                                                                  |
|------|------------------------------------------------------------------------------------------------------------------------------------------------------------------------------------------------------------------|
| M180 | Cytidine 2',3'-cyclic phosphate                                                                                                                                                                                  |
| M181 | Atalaphylline                                                                                                                                                                                                    |
| M182 | N-acetyldihydrosphingosine                                                                                                                                                                                       |
| M183 | (4r)-4-((1r,3s,5s,7r,9s,10s,12s,13r, 14s,17r)-1,3,7,12-tetrahydroxy-10,13-dimethylhexadecahydro-1h-cyclopenta[a]phenanthren-17-yl)pentanoic acid                                                                 |
| M184 | (5.alpha.)-androstane-3,11,17-trione                                                                                                                                                                             |
| M185 | .beta.-estradiol 3,17-dipropionate                                                                                                                                                                               |
| M186 | [17-(2,6-dihydroxy-6-methyl-3-oxoheptan-2-yl)-3-hydroxy-4,4,9,13,14-pentamethyl-2-[3,4,5-trihydroxy-6-(hydroxymethyl)oxan-2-yl]oxy-2,3,7,8,10,11,12,15,16,17-decahydro-1h-cyclopenta[ajphenanthren-16-yl]acetate |
| M187 | 3beta,7alpha-dihydroxy-5beta-cholan-24-oic acid                                                                                                                                                                  |
| M188 | 4-androstene-11.beta.,17.beta.-diol-3-one                                                                                                                                                                        |
| M189 | 5.alpha.-androstan-3.alpha.,17.beta.-diol-17.beta.-glucuronide                                                                                                                                                   |
| M190 | 7.alpha.,12.alpha.-dihydroxy-5.beta.-cholestan-3-one                                                                                                                                                             |
| M191 | Alpha-solanine                                                                                                                                                                                                   |
| M192 | Chenodeoxycholate                                                                                                                                                                                                |
| M193 | Chlormadinone acetate                                                                                                                                                                                            |
| M194 | Corticosterone                                                                                                                                                                                                   |
| M195 | Estra-1,3,5(10),7-tetraene-3,17.beta.-diol                                                                                                                                                                       |
| M196 | Fusidic acid                                                                                                                                                                                                     |
| M197 | GlycocholateM198: Hydrocortisone                                                                                                                                                                                 |
| M198 | Hydrocortisone                                                                                                                                                                                                   |
| M199 | Polyphyllin e                                                                                                                                                                                                    |
| M200 | Pseudojervine                                                                                                                                                                                                    |
| M201 | Quinestrol                                                                                                                                                                                                       |
| M202 | Testosterone decanoate                                                                                                                                                                                           |
| M203 | Tomatine                                                                                                                                                                                                         |
| M204 | Triamcinolone diacetate                                                                                                                                                                                          |
| M205 | Coproporphyrin I                                                                                                                                                                                                 |
| M206 | 3-(methylthio)-1-propanol                                                                                                                                                                                        |
| M207 | Melamine                                                                                                                                                                                                         |
| M208 | 1',4-sophorolactone 6',6-diacetate                                                                                                                                                                               |
| M209 | 1-o-hexadecyl-2-o-acetyl-sn-glyceryl-3-phosphory(n,n,n-trimethyl)hexanolamine                                                                                                                                    |
| M210 | 1-Stearoyl-2-hydroxy-sn-glycero-3-phosphoethanolamine                                                                                                                                                            |
| M211 | 1-Stearoyl-sn-glycerol 3-phosphocholine                                                                                                                                                                          |
| M212 | 15-keto-PGE1                                                                                                                                                                                                     |
| M213 | 3-Amino-3-(4-hydroxyphenyl)propanoate                                                                                                                                                                            |
| M214 | 4-acetamidobutanoate                                                                                                                                                                                             |
| M215 | Acetyl Tyrosine Ethyl Ester                                                                                                                                                                                      |
| M216 | Ajmalicine                                                                                                                                                                                                       |
| M217 | alpha-Guanidinoglutaric Acid                                                                                                                                                                                     |
| M218 | Bafilomycin b1                                                                                                                                                                                                   |
| M219 | Chlorothricin                                                                                                                                                                                                    |
| M220 | D-Arabinono-1,4-lactone                                                                                                                                                                                          |
| M221 | D-Pipecolinic acid                                                                                                                                                                                               |
| M222 | Dipivefrine                                                                                                                                                                                                      |
| M223 | Epirubicin                                                                                                                                                                                                       |
| M224 | G2fs2 neuac                                                                                                                                                                                                      |
| M225 | His-Lys                                                                                                                                                                                                          |
| M226 | Huperzine b                                                                                                                                                                                                      |
| M227 | Kendomycin                                                                                                                                                                                                       |
| M228 | Lys-Leu                                                                                                                                                                                                          |
| M229 | Metaflumizone                                                                                                                                                                                                    |
| M230 | Mitragynine                                                                                                                                                                                                      |
| M231 | Morphine-6-glucuronide                                                                                                                                                                                           |
| M232 | N,n-dimethylguanosine                                                                                                                                                                                            |
| M233 | N,N-Dimethylsphingosine                                                                                                                                                                                          |
| M234 | N1-Acetylspermidine                                                                                                                                                                                              |
| M235 | NG,NG-dimethyl-L-arginine(ADMA)                                                                                                                                                                                  |
| M236 | Oligomycin b                                                                                                                                                                                                     |
| M237 | Pyrrolidinium, 1-[(7r)-7-(acetyloxy)-4-hydroxy-4-oxido-3,5,9-trioxa-4-phosphapentacos-1-y]-1-methyl-, inner salt                                                                                                 |
| M238 | Vincamine                                                                                                                                                                                                        |

---





Table S3 Detailed information of the code names and metabolites in correlation analysis of the therapeutic experiment.

| Code name | Metabolites                                                                                                                                    |
|-----------|------------------------------------------------------------------------------------------------------------------------------------------------|
| M1        | Triamifos                                                                                                                                      |
| M2        | Dantrolene                                                                                                                                     |
| M3        | 3-hydroxyanthranilic acid                                                                                                                      |
| M4        | Amisulpride n-oxide                                                                                                                            |
| M5        | Citalopram                                                                                                                                     |
| M6        | Dibutyl phthalate                                                                                                                              |
| M7        | Leonurine                                                                                                                                      |
| M8        | Milnacipran                                                                                                                                    |
| M9        | Probucol                                                                                                                                       |
| M10       | Pyridaben                                                                                                                                      |
| M11       | Zinniol                                                                                                                                        |
| M12       | Decahydrogambogic acid                                                                                                                         |
| M13       | Thioridazine                                                                                                                                   |
| M14       | 2-(2-methoxyethoxy)acetic acid                                                                                                                 |
| M15       | 3-methyl-L-histidine                                                                                                                           |
| M16       | 4-amino-4-methylpentanoic acid                                                                                                                 |
| M17       | 4-hydroxy-L-isoleucine                                                                                                                         |
| M18       | Ala-Cys-Arg                                                                                                                                    |
| M19       | Ala-Val                                                                                                                                        |
| M20       | Arg-Asn                                                                                                                                        |
| M21       | Arg-Gln                                                                                                                                        |
| M22       | Arg-gly                                                                                                                                        |
| M23       | Arg-Lys                                                                                                                                        |
| M24       | Arg-ProM                                                                                                                                       |
| M25       | Arg-Pro-Pro                                                                                                                                    |
| M26       | Arg-Ser-Arg                                                                                                                                    |
| M27       | Benalaxyl                                                                                                                                      |
| M28       | Bradykinin hydroxyproline                                                                                                                      |
| M29       | Captopril                                                                                                                                      |
| M30       | Carbobenzyloxy-L-norvalyl-L-norleucine                                                                                                         |
| M31       | Creatine                                                                                                                                       |
| M32       | Dihydrofolic acid                                                                                                                              |
| M33       | DL-homocysteine                                                                                                                                |
| M34       | Gln-ser                                                                                                                                        |
| M35       | Gly-Val                                                                                                                                        |
| M36       | L-leucyl-L-leucine methyl ester                                                                                                                |
| M37       | Lys-lys                                                                                                                                        |
| M38       | Lys-Pro                                                                                                                                        |
| M39       | N-(.alpha.-linolenoyl)tyrosine                                                                                                                 |
| M40       | N-acetyl-L-aspartic acid                                                                                                                       |
| M41       | N-acetylcadaverine                                                                                                                             |
| M42       | N-acetylglutamine                                                                                                                              |
| M43       | N-arachidonoyl-.gamma.-aminobutyric acid                                                                                                       |
| M44       | N-fructosyl pyroglutamate                                                                                                                      |
| M45       | O-Phospho-L-homoserine                                                                                                                         |
| M46       | Phe-pro                                                                                                                                        |
| M47       | Pro-Thr                                                                                                                                        |
| M48       | Pyroglu-pro                                                                                                                                    |
| M49       | RaltitrexedM50: Stachydrine                                                                                                                    |
| M50       | Stachydrine                                                                                                                                    |
| M51       | Thr-Ala                                                                                                                                        |
| M52       | Thyrotropin-releasing hormone                                                                                                                  |
| M53       | Trp-Asn-Arg                                                                                                                                    |
| M54       | Trp-Tyr                                                                                                                                        |
| M55       | Val-Pro                                                                                                                                        |
| M56       | Val-Trp                                                                                                                                        |
| M57       | Haploperoside c acetate                                                                                                                        |
| M58       | (2r,3r,4r,5r,6s)-2-[[[(2r,3s,4s,5r,6r)-6-[1,7-bis(4-hydroxyphenyl)heptan-3-yloxy]-3,4,5-trihydroxyoxan-2-yl]methoxy]-6-methyloxane-3,4,5-triol |

---

|      |                                                                                                       |
|------|-------------------------------------------------------------------------------------------------------|
| M59  | 1-palmitoyl-2-linoleoyl-rac-glycerol                                                                  |
| M60  | 1,2-dilinoleoylglycerol                                                                               |
| M61  | 15-oxo-11z,13e-eicosadienoic acid                                                                     |
| M62  | 16,16-dimethyl-6-ketoprostaglandin e1                                                                 |
| M63  | 17-phenyltrinor-13,14-dihydroprostaglandin a2                                                         |
| M64  | 3-hydroxybutyrylcarnitine                                                                             |
| M65  | 3-hydroxyoleylcarnitine                                                                               |
| M66  | 5,8,11,14-eicosatetraynoic acid                                                                       |
| M67  | Acetylcarnitine                                                                                       |
| M68  | Ascorbyl stearate                                                                                     |
| M69  | L-palmitoylcarnitine                                                                                  |
| M70  | Limaprost                                                                                             |
| M71  | Methyl hexadecanoate                                                                                  |
| M72  | Monolinolenin (9c,12c,15c)                                                                            |
| M73  | Myristoyl-l-carnitine                                                                                 |
| M74  | Oieic acid methyl ester                                                                               |
| M75  | Oleoyl-l-carnitine                                                                                    |
| M76  | Prostaglandin f2.alpha.                                                                               |
| M77  | Stearoylcarnitine                                                                                     |
| M78  | 1-[2,4,6-trihydroxy-3-[7-hydroxy-2-(4-hydroxyphenyl)-3,4-dihydro-2h-chromen-4-yl]phenyl]dodecan-1-one |
| M79  | Epimedin a                                                                                            |
| M80  | Flavonol base + 4o, o-hex-dhex-pen                                                                    |
| M81  | Mgmg 18:2                                                                                             |
| M82  | 1-(1,2r-dioctanoylphosphatidyl)inositol-3,4-bisphosphate                                              |
| M83  | 1-(1z-hexadecenyl)-sn-glycero-3-phosphocholine                                                        |
| M84  | 1-o-hexadecyl-2-o-(5z,8z,11z,14z,17z-eicosapentaenoyl)-sn-glyceryl-3-phosphorylcholine                |
| M85  | 1-palmitoyl-2-lauroyl-sn-glycero-3-phosphorylcholine                                                  |
| M86  | 1-stearoyl-2-hydroxy-sn-glycero-3-phosphocholine                                                      |
| M87  | 1,2-distearoyl-sn-glycero-3-phospho-l-serine                                                          |
| M88  | 2-arachidonoyl-1-palmitoyl-sn-glycero-3-phosphoethanolamine                                           |
| M89  | Pg 32:1                                                                                               |
| M90  | Pi 36:4                                                                                               |
| M91  | Beta-hydroxybutyrate                                                                                  |
| M92  | Pravastatin                                                                                           |
| M93  | Scopolamine                                                                                           |
| M94  | 5'-phosphoribosyl-5-amino-4-imidazolecarboxamide (aicar)                                              |
| M95  | 1-methylxanthine                                                                                      |
| M96  | Phenol,4-[2-[[2-benzo[b]thien-3-yl-9-(1-methylethyl)-9h-purin-6-yl]amino]ethyl]-                      |
| M97  | 1h-indole-3-ethanamine,5-methoxy-n-methyl-n-(1-methylethyl)-                                          |
| M98  | Ala-Ala                                                                                               |
| M99  | Indoleacetic acid                                                                                     |
| M100 | N-Acetylserotonin                                                                                     |
| M101 | Genistein 7-o-beta-d-glucoside-6"-o-malonate                                                          |
| M102 | 4-ketopimelic acid                                                                                    |
| M103 | 1,3-dicyclohexylurea                                                                                  |
| M104 | 1-o-hexadecyl-2-deoxy-2-thio-s-acetyl-sn-glyceryl-3-phosphorylcholine                                 |
| M105 | Betaine aldehyde                                                                                      |
| M106 | Guanidine                                                                                             |
| M107 | L-carnitine                                                                                           |
| M108 | Rac-4-(methylamino)-1-(3-pyridyl)-1-butanol                                                           |
| M109 | SphingosineM110: Angoroside a                                                                         |
| M110 | Angoroside a                                                                                          |
| M111 | Blood group h trisaccharide                                                                           |
| M112 | Catalpol                                                                                              |
| M113 | D-(+)-mannose                                                                                         |
| M114 | D-pinitol                                                                                             |
| M115 | D-Threitol                                                                                            |
| M116 | D-xylose                                                                                              |
| M117 | Disialyllacto-n-tetraose                                                                              |
| M118 | Dronedarone                                                                                           |
| M119 | G2f                                                                                                   |
| M120 | Galacto-n-biose                                                                                       |

---

---

|      |                                                                                                                                                                                                                                                                                                     |
|------|-----------------------------------------------------------------------------------------------------------------------------------------------------------------------------------------------------------------------------------------------------------------------------------------------------|
| M121 | Glyceraldehyde                                                                                                                                                                                                                                                                                      |
| M122 | N-acetyl-.beta.-d-mannosamine                                                                                                                                                                                                                                                                       |
| M123 | Nga3                                                                                                                                                                                                                                                                                                |
| M124 | Trifluperidol                                                                                                                                                                                                                                                                                       |
| M125 | (2s,3s,4s,5r,6r)-6-[[[(2s,3r,4r,6ar,6bs,8as,14br)-2-hydroxy-4-(hydroxymethyl)-4,6a,6b,11,11,14b-hexamethyl-8a-[[[(2s,3r,4s,5s,6r)-3,4,5-trihydroxy-6-(hydroxymethyl)oxan-2-yl]oxycarbonyl-1,2,3,4a,5,6,7,8,9,10,12,12a,14,14a-tetradecahydricipen-3-yl]oxy]-3,4,5-trihydroxyoxane-2-carboxylic acid |
| M126 | .alpha.-hederin                                                                                                                                                                                                                                                                                     |
| M127 | 2,5,8,9-tetracetoxo-15-hydroxy-3-benzoyloxyacetoxo-7-isobutyroyloxy-14-oxojatropha-6(17),11e-dien                                                                                                                                                                                                   |
| M128 | 3-deacetylsalannin                                                                                                                                                                                                                                                                                  |
| M129 | Anthranoyllycoctonine                                                                                                                                                                                                                                                                               |
| M130 | Beta-carotene-3,4,3'4'-tetrol                                                                                                                                                                                                                                                                       |
| M131 | Coenzyme q1                                                                                                                                                                                                                                                                                         |
| M132 | NcGc00169093-01                                                                                                                                                                                                                                                                                     |
| M133 | Pristanic acid                                                                                                                                                                                                                                                                                      |
| M134 | Steviolbioside                                                                                                                                                                                                                                                                                      |
| M135 | Methopterin                                                                                                                                                                                                                                                                                         |
| M136 | Niacinamide                                                                                                                                                                                                                                                                                         |
| M137 | Cytidine-5'-monophospho-n-acetylneuraminic acid                                                                                                                                                                                                                                                     |
| M138 | Cytidine monophosphate n-acetylneuraminic acid                                                                                                                                                                                                                                                      |
| M139 | Thymidine 5'-monophosphate                                                                                                                                                                                                                                                                          |
| M140 | 2-hydroxy-6-methylquinoline-3-carbaldehyde                                                                                                                                                                                                                                                          |
| M141 | N-acetyldihydrosphingosine                                                                                                                                                                                                                                                                          |
| M142 | N-octanoylsphingosine                                                                                                                                                                                                                                                                               |
| M143 | Sm d34:1                                                                                                                                                                                                                                                                                            |
| M144 | Sm d34:2                                                                                                                                                                                                                                                                                            |
| M145 | (4r)-4-((1r,3s,5s,7r,9s,10s,12s,13r,14s,17r)-1,3,7,12-tetrahydroxy-10,13-dimethylhexadecahydro-1h-cyclopenta[a]phenanthren-17-yl)pentanoic acid                                                                                                                                                     |
| M146 | .alpha.-solanine                                                                                                                                                                                                                                                                                    |
| M147 | 5alpha-androstan-17beta-ol-3-one                                                                                                                                                                                                                                                                    |
| M148 | 7.alpha.-hydroxydehydroepiandrosteronep                                                                                                                                                                                                                                                             |
| M149 | Oxytocin                                                                                                                                                                                                                                                                                            |
| M150 | Pseudojervine                                                                                                                                                                                                                                                                                       |
| M151 | Taurocholic acidpT                                                                                                                                                                                                                                                                                  |
| M152 | Tetrahydrocorticosterone                                                                                                                                                                                                                                                                            |
| M153 | Tomatine                                                                                                                                                                                                                                                                                            |
| M154 | Triamcinolone diacetate                                                                                                                                                                                                                                                                             |
| M155 | Trillin                                                                                                                                                                                                                                                                                             |
| M156 | Bilirubin                                                                                                                                                                                                                                                                                           |
| M157 | Urobilin                                                                                                                                                                                                                                                                                            |
| M158 | (-)-Naringenin                                                                                                                                                                                                                                                                                      |
| M159 | 1-Myristoyl-sn-glycero-3-phosphocholine                                                                                                                                                                                                                                                             |
| M160 | 1-o-hexadecyl-2-o-acetyl-sn-glyceryl-3-phosphory(n,n,n-trimethyl)hexanolamine                                                                                                                                                                                                                       |
| M161 | 1-Stearoyl-2-hydroxy-sn-glycero-3-phosphoethanolamine                                                                                                                                                                                                                                               |
| M162 | 1,3-cyclobutanedicarboxylic acid, 2,4-diphenyl-, 1-(1-naphthalenyl) ester,(1.beta.,2r,3.alpha.,4r)-                                                                                                                                                                                                 |
| M163 | 2',3'-di-o-acetyladenosine                                                                                                                                                                                                                                                                          |
| M164 | 2',4',6'-trimethoxychalcone                                                                                                                                                                                                                                                                         |
| M165 | 4-hydroxy-1-(2-hydroxyethyl)-2,2,6,6-tetramethylpiperidine                                                                                                                                                                                                                                          |
| M166 | Acetyl-DL-Valine                                                                                                                                                                                                                                                                                    |
| M167 | Arg-Cys                                                                                                                                                                                                                                                                                             |
| M168 | Chlorothricin                                                                                                                                                                                                                                                                                       |
| M169 | Cholesterol 3-sulfate                                                                                                                                                                                                                                                                               |
| M170 | Cinchonine                                                                                                                                                                                                                                                                                          |
| M171 | Cylindrospermopsin                                                                                                                                                                                                                                                                                  |
| M172 | Diffraitaic acid                                                                                                                                                                                                                                                                                    |
| M173 | Digalacturonic acid                                                                                                                                                                                                                                                                                 |
| M174 | Erucifoline                                                                                                                                                                                                                                                                                         |
| M175 | Gemcitabine                                                                                                                                                                                                                                                                                         |
| M176 | Indole-2-carboxylic acid                                                                                                                                                                                                                                                                            |
| M177 | Jasmine lactone                                                                                                                                                                                                                                                                                     |

---

---

|      |                                       |
|------|---------------------------------------|
| M178 | Kendomycin                            |
| M179 | N-Stearoylsphingosine (Ceramide C18)  |
| M180 | Nocardamine                           |
| M181 | Phthalic acid Mono-2-ethylhexyl Ester |
| M182 | Rabelomycin                           |
| M183 | Secoisolariciresinol diglucoside      |
| M184 | Thalsimidine                          |

---
