# Supplementary figures and images for: Lactiplantibacillus biofilm and planktonic cells ameliorate ulcerative colitis in mice via immunoregulatory activity, gut metabolism and microbiota modulation
Source: Royal Society of Chemistry journal article supplement (doi:10.1039/d3fo02733c), 2023-01-01

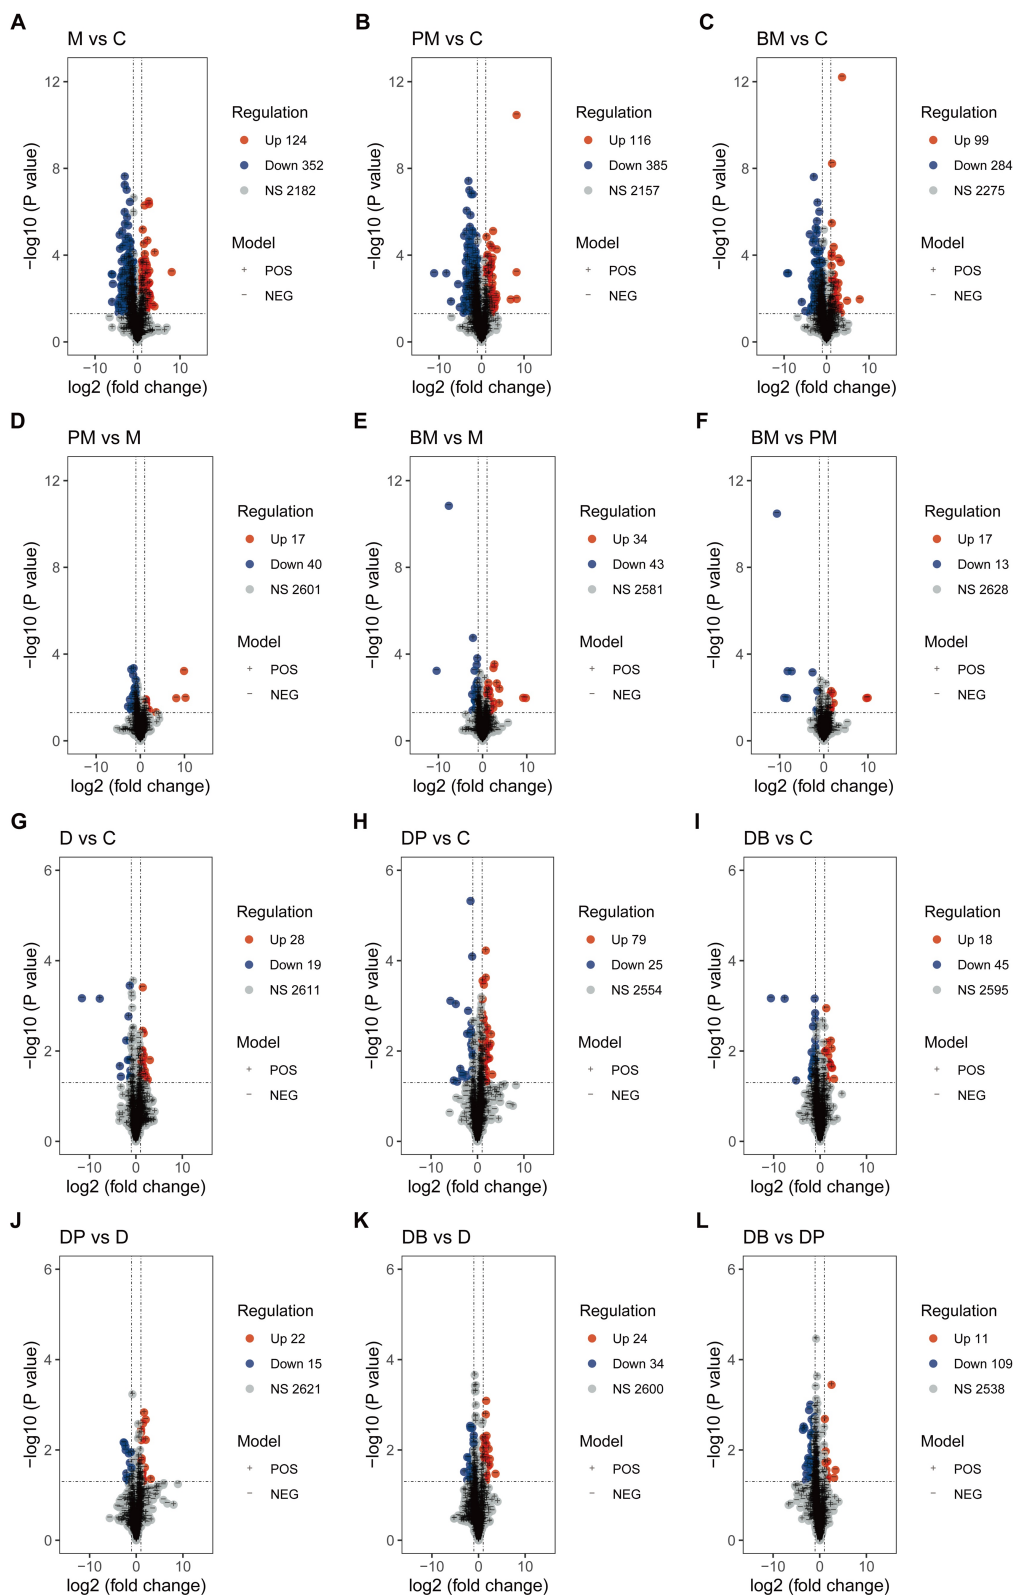

Supplement: d3fo02733c3.pdf [file d3fo02733c3.pdf]

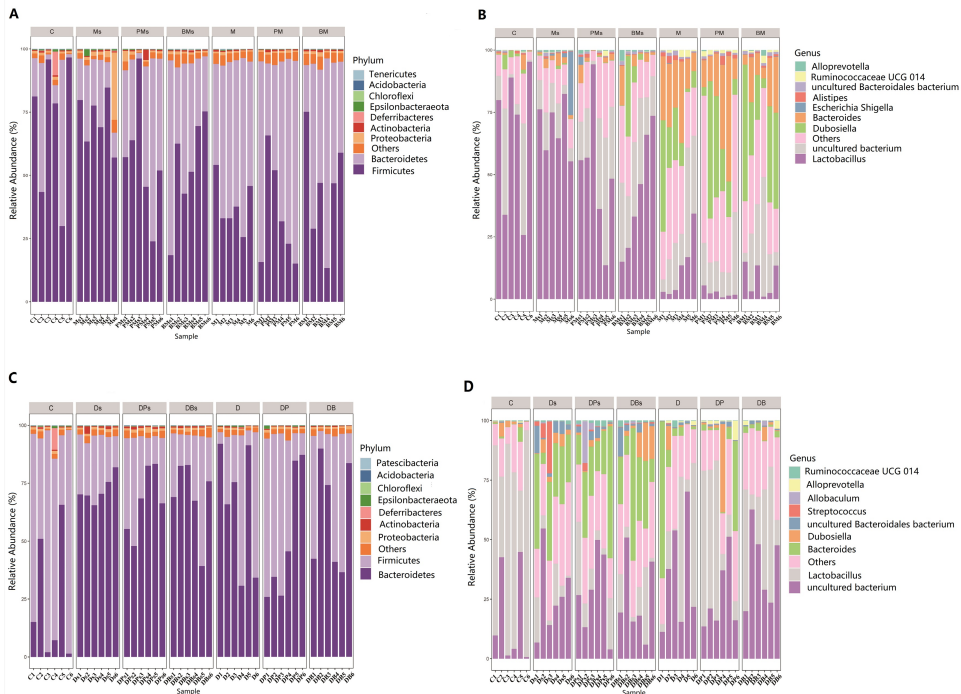

Supplement: d3fo02733c5.pdf [file d3fo02733c5.pdf]
